# Supplementary material for: In silicoapproach: biological prediction of nordentatin derivatives as anticancer agent inhibitors in the cAMP pathway
Source: Royal Society of Chemistry journal article supplement (doi:10.1039/d0ra07838g), 2020-01-01
Supplement: d0ra07838g1.pdf [file d0ra07838g1.pdf]

## Supplementary materials

### **In silico approach: Biological activities prediction of nordentatin derivatives as anticancer agent in cAMP pathway inhibitors**

Muhammad Ikhlas Abdjan<sup>a</sup>, Nanik Siti Aminah<sup>a\*</sup>, Imam Siswanto<sup>a</sup>, Tin Myo Thant<sup>b,c</sup>, Alfinda Novi Kristanti<sup>a</sup>, Yoshiaki Takaya<sup>d</sup>

<sup>a</sup>Departement of Chemistry, Faculty of Science and Technology, Universitas Airlangga, Surabaya 60115, Indonesia. E-mail: nanik-s-a@fst.unair.ac.id

<sup>b</sup>Poscdoct fellow Department of Chemistry, Faculty of Science and Technology, Universitas Airlangga, Komplek Kampus C, Jl. Mulyorejo, Surabaya, Indonesia. 60115

<sup>c</sup>Department of Chemistry, Mandalay Degree College, Mandalay, Myanmar

<sup>d</sup>Faculty of Pharmacy, Meijo University, 150 Yagotoyama, Tempaku, Nagoya, 468-8503 Japan



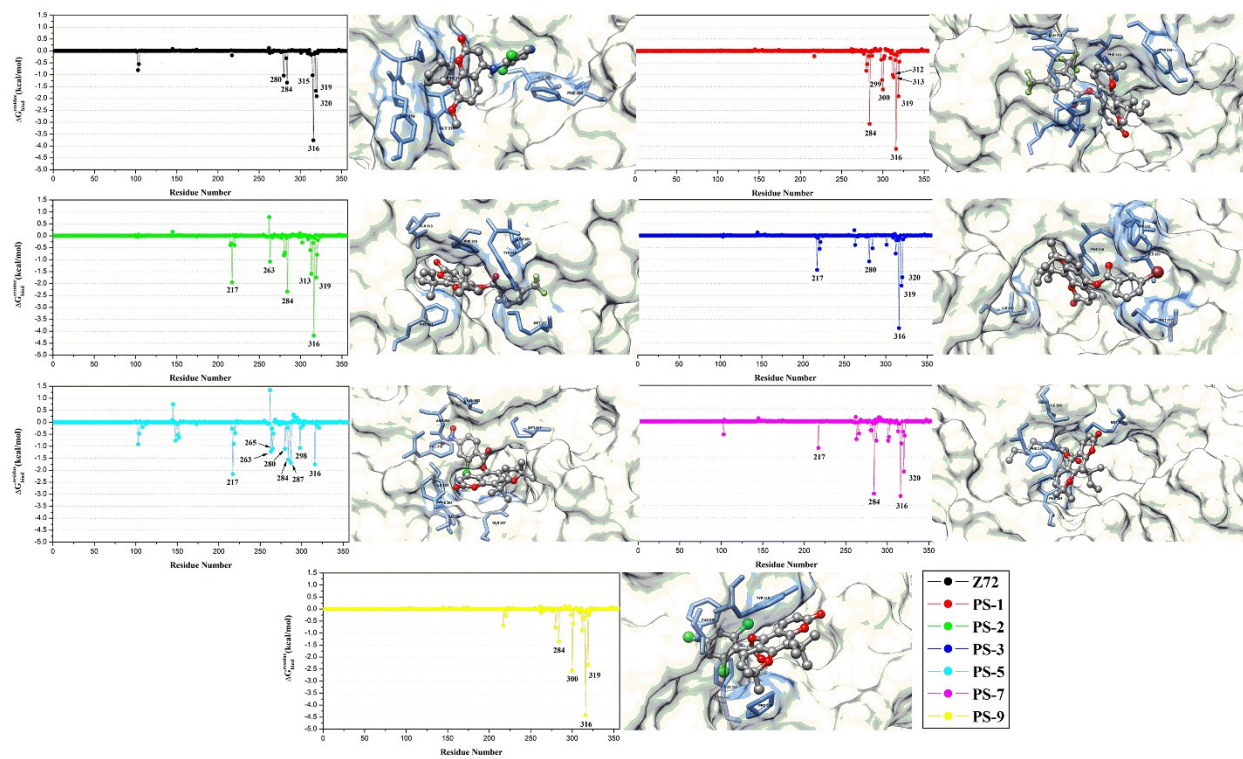

Fig. S2. The residual energy decomposition plotted along with the simulation over the last 20 ns of each complex.

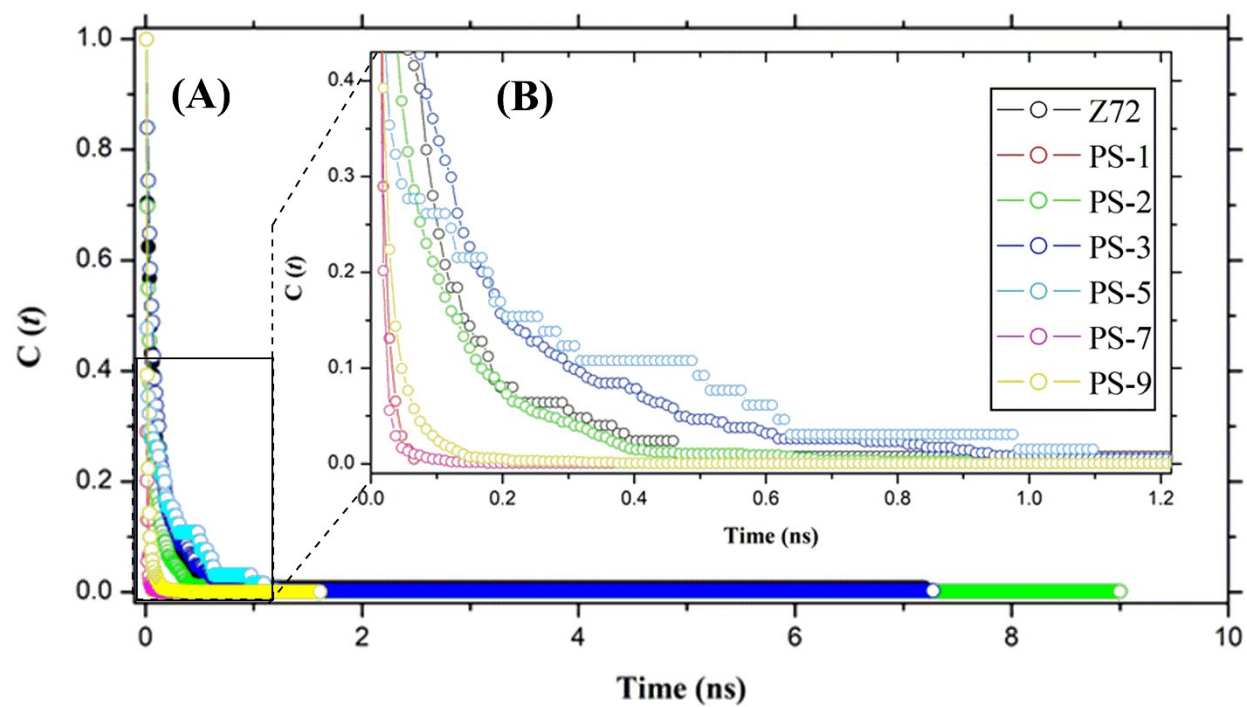

Fig. S3. Lifetime H-bond of each complex

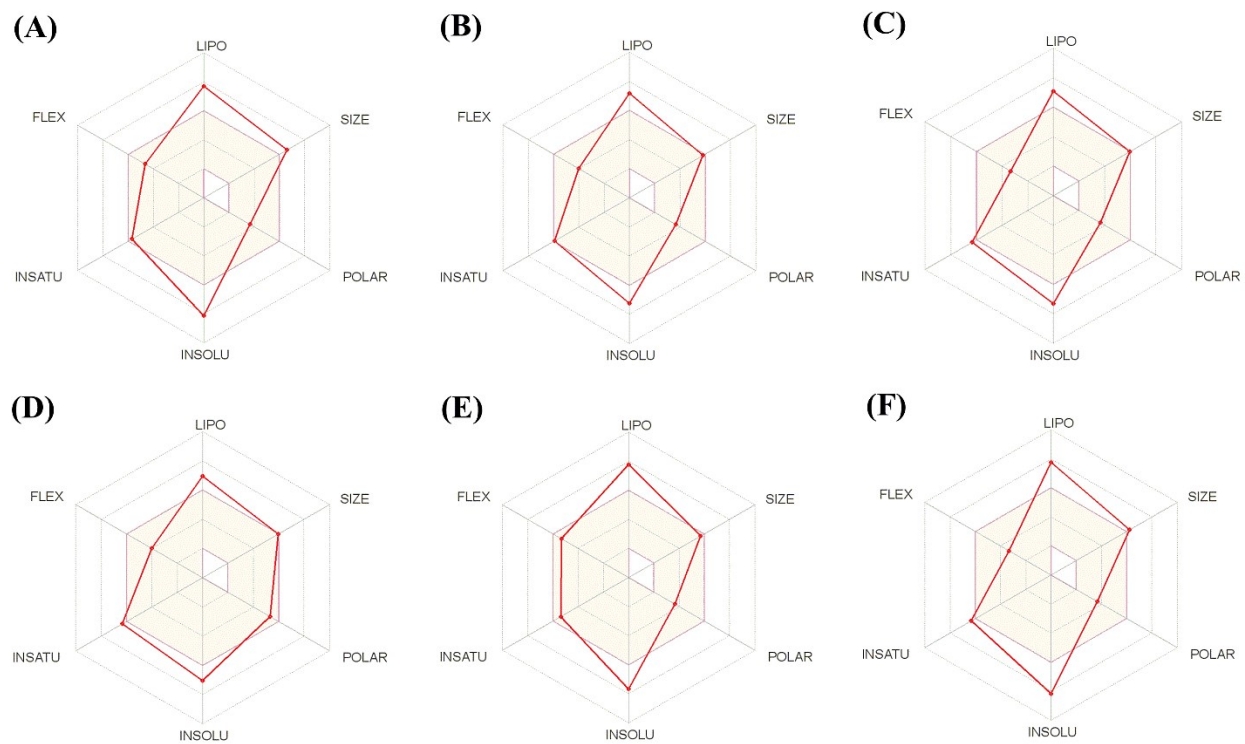

**Fig. S4** The suitable physicochemical space for oral bioavailability prediction (A) PS-1, (B) PS-2, (C) PS-3, (D) PS-5, (E) PS-7, and (F) PS-9

**Table S1** ADMET prediction of best candidates used pkCSM server

| Parameters                                                          | PS-1  | PS-2  | PS-3  | PS-5  | PS-7  | PS-9  |
|---------------------------------------------------------------------|-------|-------|-------|-------|-------|-------|
| <b>Absorption</b>                                                   |       |       |       |       |       |       |
| Water Solubility (log mol/L)                                        | -6.31 | -6.15 | -5.95 | -5.97 | -6.31 | -6.30 |
| Caco-2 Permeability (log P <sub>app</sub> in 10 <sup>-6</sup> cm/s) | 1.30  | 1.24  | 1.19  | 0.83  | 1.21  | 1.21  |
| Intestinal Absorption-Human (% Absorbed)                            | 90.56 | 93.83 | 95.38 | 100   | 95.15 | 92.22 |
| Skin Permeability (Log K <sub>p</sub> )                             | -2.74 | -2.74 | -2.74 | -2.73 | -2.73 | -2.74 |
| P-glycoprotein substrate                                            | No    | No    | No    | No    | No    | No    |
| <b>Distribution</b>                                                 |       |       |       |       |       |       |
| VD <sub>ss</sub> -Human (log L/Kg)                                  | -0.06 | -0.06 | -0.04 | -0.48 | -0.15 | 0.01  |
| Fraction Unbound-Human (Fu)                                         | 0.01  | 0.03  | 0.04  | 0.04  | 0.05  | 0.02  |
| BBB Permeability (log BB)                                           | -0.25 | -0.26 | -0.26 | -1.08 | -0.41 | -0.26 |
| <b>Metabolism</b>                                                   |       |       |       |       |       |       |
| CYP2D6 Substrate                                                    | No    | No    | No    | No    | No    | No    |
| CYP1A2 Inhibitor                                                    | No    | No    | No    | No    | No    | No    |
| CYP2D6 Inhibitor                                                    | No    | No    | No    | No    | No    | No    |
| <b>Excretion</b>                                                    |       |       |       |       |       |       |
| Total Clearance (log mL/min/Kg)                                     | -0.36 | -0.02 | -0.09 | 0.13  | 0.36  | 0.08  |
| Renal OCT2 Substrate                                                | No    | No    | No    | No    | No    | No    |
| <b>Toxicity</b>                                                     |       |       |       |       |       |       |
| AMES Toxicity                                                       | No    | No    | No    | No    | No    | No    |
| Max. Tolerated Dose-Human (log mg/Kg/day)                           | 0.53  | 0.54  | 0.59  | 0.39  | 0.56  | 0.61  |
| hERG I Inhibitor                                                    | No    | No    | No    | No    | No    | No    |
| Oral Rat Acute Toxicity-LD50 (mol/Kg)                               | 3.46  | 3.21  | 2.97  | 2.54  | 2.72  | 3.20  |
| Oral Rat Chronic Toxicity-LOAEL (log mg/Kg_bw/day)                  | 0.71  | 1.21  | 1.49  | 1.33  | 1.45  | 1.11  |
| Hepatotoxicity                                                      | Yes   | Yes   | Yes   | Yes   | No    | No    |
| Skin Sensitisation                                                  | No    | No    | No    | No    | No    | No    |
